# Supplementary material
Source: PubMed Central journal article supplement (PMC2663325)
Supplement: supp_91_1_167__1.pdf [file supp_91_1_167__1.pdf]

TABLE E-1 Clinical Data on the Included Subjects\*

| Case               | Sex               | Age (yr) | Weight (kg) | Height (m)  | Injured Knee    | Time Between Injury and Examination (mo) | IKDC Score (points) | Injury Mechanism               | Injuries                                          |
|--------------------|-------------------|----------|-------------|-------------|-----------------|------------------------------------------|---------------------|--------------------------------|---------------------------------------------------|
| 1                  | Male              | 42       | 92          | 1.91        | Right           | 4                                        | 75.9                | Direct impact, rugby           | PCL tear; med. meniscus tear†, 40% removal        |
| 2                  | Female            | 21       | 60          | 1.72        | Left            | 4                                        | 40.2                | Direct impact, softball        | Isolated PCL tear                                 |
| 3                  | Female            | 51       | 70          | 1.65        | Right           | 6                                        | 65.5                | Direct impact, motor-veh. acc. | Isolated PCL tear                                 |
| 4                  | Male              | 39       | 89          | 1.83        | Right           | 9                                        | 28.2                | Fall on knee                   | Isolated PCL tear                                 |
| 5                  | Male              | 30       | 75          | 1.76        | Left            | 2                                        | 75.5                | Direct impact, football        | PCL tear; partial-thickness tear of med. meniscus |
| 6                  | Male              | 39       | 84          | 1.78        | Left            | 12                                       | 40.2                | Fall on knee                   | PCL tear; med. meniscus tear†, 30% removal        |
| 7                  | Male              | 20       | 77          | 1.75        | Right           | 5                                        | 51.7                | Direct impact, motor-veh. acc. | Isolated PCL tear                                 |
| 8                  | Male              | 64       | 97          | 1.78        | Left            | 9                                        | 27.6                | Direct impact, skiing          | PCL tear; med. meniscus tear†, 20% removal        |
| 9                  | Male              | 32       | 79          | 1.80        | Right           | 4                                        | 59.8                | Direct impact, soccer          | PCL tear; lat. meniscus tear†, 30% removal        |
| 10                 | Female            | 19       | 54          | 1.65        | Left            | 6                                        | 47.5                | Direct impact, motor-veh. acc. | Isolated PCL tear                                 |
| 11                 | Male              | 32       | 79          | 1.81        | Right           | 10                                       | 61.5                | Direct impact, motor-veh. acc. | Isolated PCL tear                                 |
| 12                 | Male              | 27       | 97          | 1.79        | Right           | 2                                        | 49.4                | Direct impact, skiing          | Isolated PCL tear                                 |
| 13                 | Female            | 45       | 82          | 1.60        | Right           | 4                                        | 39.1                | Direct impact, motor-veh. acc. | Isolated PCL tear                                 |
| 14                 | Male              | 24       | 79          | 1.79        | Right           | 1                                        | 57.5                | Direct impact, soccer          | Isolated PCL tear                                 |
| Total/Average ± SD | 10 male, 4 female | 35 ± 13  | 80 ± 12     | 1.76 ± 0.08 | 9 right, 5 left | 5.6                                      | 51.4                |                                |                                                   |

\*IKDC = International Knee Documentation Committee; SD = standard deviation; PCL = posterior cruciate ligament. †Longitudinal tear, posterior horn.
